# Supplementary material for: Makorin 1 controls embryonic patterning by alleviating Bruno1-mediated repression of oskar translation
Source: PLoS Genet. 2020 Jan 24;16(1):e1008581. doi: 10.1371/journal.pgen.1008581 (PMC7001992; doi:10.1371/journal.pgen.1008581)
Supplement: S1 Table — All proteins with an FDR ≤ 0.05 05 and log2 fold change ≥ 2 are depicted. (see supplementary file 1) (XLSX) [file pgen.1008581.s014.xlsx]

## Sheet: Sheet1
Protein IDs	logFC	adj. P-Val	Gene names
Q9VP20	11.4852	0.000296504	Mkrn1
Q9W158	5.05642	0.000745416	CG4612
P41073	2.61276	0.00183602	Pep
P10090	6.02755	0.00238954	w
P21187	2.69691	0.00373061	pAbp
E1JHA4	2.32159	0.00433335	Hrb27C
Q95RE4	3.10465	0.0077244	yps
A8E6M1	3.77913	0.0107345	CG5477
Q9W255	3.79064	0.0137157	qkr58E-1
Q08473-2	5.46901	0.0137157	sqd
Q9VUQ5	3.80338	0.0164687	AGO2
Q9VZE4	2.56316	0.019234	CG1316
Q9I7T7-2	4.17029	0.0227303	CG11505
Q94901	2.15089	0.0227303	lark
Q8T4F7-1	2.96209	0.0227303	ena
A0A0B4K7Y7	3.88184	0.0227303	larp
A0A126GUS7	2.16934	0.0266898	Fmr1
Q9VZ69	3.60763	0.028591	Imp
Q9W4C1	4.79429	0.0293107	CG15784
Q9W3M7	3.20591	0.0338262	mahe
A4V3J5	2.08104	0.0340582	Hrb98DE
Q9VN21	3.93118	0.0341682	lost
Q9VQ76	2.1151	0.038073	tho2
A1Z6I7	2.58261	0.0471396	BubR1
Q3YMU0	2.67274	0.0471396	ERp60
