# Supplementary material for: Makorin 1 controls embryonic patterning by alleviating Bruno1-mediated repression of oskar translation
Source: PLoS Genet. 2020 Jan 24;16(1):e1008581. doi: 10.1371/journal.pgen.1008581 (PMC7001992; doi:10.1371/journal.pgen.1008581)
Supplement: S2 Table — All proteins with an FDR ≤ 0.05 and log2 fold change ≥ 2 are depicted. (see supplementary file 1). (XLSX) [file pgen.1008581.s015.xlsx]

## Sheet: Sheet1
Protein IDs	logFC	adj. P-Val	Gene names
Q9VP20	13.7401	0.000134744	Mkrn1
P10090	8.61633	0.000134744	w
Q08473-2	8.17552	0.00035745	sqd
Q9I7T7-2	8.09576	0.000254451	CG11505
Q9VYK0	7.62105	0.000366048	Smr
Q9VUQ5	7.51992	0.000134744	AGO2
G7H829	7.43579	0.000254451	ck-RA
X2JGG6	7.19394	0.000162608	Hsp26
O76922	7.1214	0.000733144	aub
Q9W158	6.81235	0.000134744	CG4612
A1Z9K0	6.73915	0.00035745	CG6701
Q9VP80	6.67622	0.000444136	siz
Q9VJJ8	6.52624	0.000134744	CG4668
Q0E8J0	6.48871	0.000162608	MEP-1
X2JBC1	6.41485	0.000367141	Upf1
P20028	6.36663	0.000206547	RpI135
Q7KM03	6.36547	0.000215813	Eip63E
Q8T4F7-1	6.3153	0.000311926	ena
A0A0B4K7Y7	6.12846	0.000709859	larp
P54357	6.01883	0.00035745	Mlc-c
Q9W4C1	5.879	0.00245315	CG15784
Q9XZ11	5.8618	0.000210226	CG7139
Q8IH14	5.83774	0.00018719	ssx
M9PE12	5.7809	0.000482069	E(bx)
A0A0B4KI43	5.62479	0.000210226	woc
Q9VCH1	5.59861	0.00018719	eIF4G2
P09180	5.56825	0.00276444	RpL4
Q9VC45	5.56507	0.000394291	asp
Q9VZ69	5.56107	0.000973579	Imp
X2JEU3	5.5554	0.00117871	CG1737-RA
Q9W254	5.46766	0.00105909	qkr58E-2
A0A0B4KI32	5.4668	0.000482069	cindr
E1JJS2	5.46552	0.000444136	RhoGAP19D
X2JC82	5.45917	0.000206547	Hsp27
X2J8Z1	5.36994	0.00157629	Pde11
P04052	5.36804	0.000733144	RpII215
X2JD52	5.36767	0.000134744	CG11929
Q8MLW2	5.30717	0.00173302	dom
Q9VCK0	5.25802	0.000718607	eIF-3p66
Q95WY3	5.25779	0.000366048	Nop56
Q7KMJ6	5.23226	0.000394291	nito
Q9W4C4	5.215	0.000721505	spoon
Q95RE4	5.19262	0.000206547	yps
Q9VJY4	5.1041	0.000248698	CG10859
Q9VVA9	5.10297	0.000435286	Zcchc7
M9NE68	5.015	0.000973579	Hsp23
Q9VIZ0	4.99734	0.000972107	l(2)37Cg
Q9VN21	4.99685	0.00279737	lost
Q8SWR8	4.98841	0.000764081	Atx2
Q960Y8	4.94006	0.00114667	alt
A8E6M1	4.93281	0.00049277	CG5477
Q9VZJ3	4.9266	0.000248698	Rcd5
Q9VR20	4.90275	0.00045857	CG3251
Q9W255	4.8755	0.000733144	qkr58E-1
Q7JUX9	4.87242	0.00125228	trmt10c
Q7KN75	4.867	0.00147156	Dp1
Q8T076	4.83905	0.000714945	Rcd1
Q9VNB9	4.81623	0.00109418	RpL35A
E1JJI5	4.8144	0.000134744	CkIalpha
M9MRS7	4.80994	0.00045857	Myo31DF
M9PFQ9	4.77131	0.000815248	CG42348
Q9VLQ9	4.74957	0.000793045	Snx6
A0A0B4LG05	4.67905	0.000162608	tud
M9PE93	4.63436	0.000266778	ens
R9Q794	4.62758	0.000369057	RpL5
Q9W328	4.6199	0.000506294	Lst8
E2QCN4	4.61403	0.000815248	Not1
X2JC94	4.58807	0.00171866	Pgam5
E1JGZ9	4.58093	0.00201565	Prosalpha1
Q23985	4.55962	0.000191842	dx
Q961C3	4.5261	0.0012709	CG8478
Q8IRW8-2	4.51391	0.000327344	trr
A1Z6I7	4.49594	0.00111584	BubR1
Q9VXW7	4.4923	0.000846617	gce
Q9VI58	4.48707	0.000733144	Tailor
M9PDR2	4.47546	0.00045857	hipk
O97125	4.45961	0.00045857	Hsp68
Q9V4C8-5	4.43268	0.0013574	Hcf
Q9VRP5	4.4061	0.000482069	scny
Q9W1V3	4.40056	0.00035745	Fib
Q9VPB2	4.37511	0.00035745	Spc105R
Q9V400	4.3413	0.00232595	Ilk
P34739	4.33442	0.000215813	lds
Q9W0T7	4.32779	0.00035745	CG16940-RC
Q9VK59	4.31502	0.00045857	CG5787
Q9VEN9	4.29888	0.00106241	Patr-1
P91926	4.28683	0.000509751	AP-2alpha
Q9VC61-2	4.27645	0.00242814	CG13624
Q9W542	4.27557	0.00185228	mip130
M9MRN1	4.2639	0.00045857	Svil
M9PDG3	4.25491	0.00185228	stc
A0A0B4KHH6	4.22406	0.00171866	dgt1
Q9V9N9	4.2145	0.000444136	CG3651-RA
P41093	4.18276	0.0137199	RpL18A
Q9VNP5	4.15106	0.000818748	BoYb
Q9VZF5	4.12409	0.0110627	pav
Q9W4M9	4.11545	0.00049277	Nsun2
Q9W0B8	4.11132	0.000268167	alphaCOP
X2JCS6	4.09119	0.00045857	RpL7A
Q9VNF7	4.08702	0.00176456	MTA1-like
Q9VWL7	4.07835	0.00281709	RhoGAP18B
Q9VEZ8	4.07561	0.00716297	pnr
Q59DT1	4.07532	0.000444136	CG2225
M9NGE9	4.04172	0.000912395	CG43088
C9QP42	4.03996	0.00249993	eIF-4a
Q7KNQ9	4.03581	0.00187392	cnk
Q9W4M7	4.00927	0.00295836	tyf
Q94901	4.0084	0.000210226	lark
M9PC08	4.00567	0.000257968	ex
P02299	3.97947	0.0161276	His3
P11346	3.97525	0.00356819	phl
P21187	3.9597	0.00018719	pAbp
Q9VMX3	3.94692	0.00018719	CG3756
Q9U9Q4	3.92272	0.00106241	eIF-3p40
Q9V493	3.90921	0.00187392	CG11076-RA
P32392	3.86773	0.00134177	Arp3
Q9VZZ9-2	3.86399	0.00049277	dos
P41073	3.81753	0.00018719	Pep
Q5LJZ2	3.81686	0.000738728	Set1
Q9VP57	3.80951	0.00190225	pzg
Q9VB22	3.77599	0.000966142	pins
Q7KVX5	3.74153	0.00097069	Vap-33A
Q9W3M7	3.71794	0.00329539	mahe
A0A0B4K891	3.70984	0.00115524	CG8963
Q9V3G7	3.70797	0.000435286	Rpn7
O62621	3.68951	0.0284224	betaCop
A0A0B4LF82	3.65613	0.000591235	Sin3A
O62530	3.65364	0.000309448	AP-2mu
Q9VQ94	3.64827	0.0186832	Sec24CD
Q7K3D8	3.62864	0.00515636	DMAP1
Q9N675	3.62497	0.00144822	Zyx
Q7K4P0	3.62067	0.000338105	CG8617
Q9VRX7	3.61587	0.000829437	Rexo5
A0A0B4KHQ0	3.6072	0.001023	pll
P20240	3.5764	0.000949276	Ote
X2J5G6	3.56097	0.0017456	RpL7
Q9VR58	3.55811	0.000540804	Cp110
O02193	3.55059	0.00424192	mof
Q9V9M7	3.5501	0.00718078	RpL21
B7Z0B0	3.54844	0.000733144	sowah
Q9VCD8	3.51527	0.000328537	SMC1
Q9VZE4	3.49758	0.00114667	CG1316
Q9VFV9	3.49564	0.000973579	Droj2
A1Z757	3.48088	0.000733144	phr
Q9VJD4	3.41703	0.00198529	Sgt
Q9VQK7	3.39084	0.00035745	Sf3b2
Q9VWQ3	3.37445	0.000444136	CG18259-RA
Q9VV79	3.36661	0.00247105	spd-2
Q9W0S6	3.36298	0.00396773	mRpL17
Q9VCY1	3.35814	0.000733144	CG6937
Q7KHK9	3.35814	0.000254451	dream
A0A0B4LFE1	3.3467	0.00105909	CG10139
A8DZ29	3.34204	0.000266778	eIF4G
Q23979-2	3.30993	0.000266778	Myo61F
E2QC83	3.3057	0.00247105	Pabp2
A0A126GUS7	3.29243	0.00109029	Fmr1
Q9VM69	3.28396	0.00177103	nop5
Q86BB4	3.28327	0.00808666	tacc
Q9V9Q4	3.25377	0.00106241	CG1416
Q9VHR5	3.25232	0.00035745	CG9684
Q8MT78	3.23404	0.00315135	CG5522
L0MPY6	3.2324	0.00191927	Slip1
M9MS35	3.2266	0.000248698	Cfp1
Q9VS83	3.22625	0.00328988	CG7546
A0A0B4LI86	3.2216	0.0076312	RpII140
Q7KMQ0	3.17702	0.00035745	Rpt1
Q9VEZ3	3.15644	0.00176456	msps
A4V3J5	3.15516	0.000572303	Hrb98DE
Q8INR6	3.14052	0.0044262	gpp
A8JUY3	3.12713	0.000529081	RpIIIC160
A1Z6E6	3.12369	0.0415023	d4
Q9VHK3	3.123	0.0102717	pyd
Q9VWI1	3.12003	0.00523035	pcm
A0A0B4K6G6	3.10805	0.00780986	CG7518
A1Z6Z9	3.09345	0.00035745	didum
Q9VPC0	3.08091	0.000733144	Pitslre
M9PI58	3.07852	0.00130571	stwl
M9PE74	3.07651	0.00257886	nocte
Q9V9W2	3.07161	0.00164639	RpL6
Q9W0P3	3.06776	0.00149158	MED30
Q9W531	3.06146	0.00111584	EG:22E5.7
Q9VQZ6	3.05501	0.00313065	Elp3
Q960X8	3.05456	0.000535988	Hrs
Q0E931	3.04681	0.000714945	Dgp-1
P36241	3.03496	0.0029834	RpL19
Q9VT61	3.03318	0.00353116	CG8108
A0A126GUM8	3.03061	0.00549371	lig
Q9VPH2	3.02236	0.00459944	DNApol-alpha60
Q7KK96	3.02171	0.00523035	SMC2
Q8SY39	3.0077	0.0017456	CG6994
Q9VNE9	3.00711	0.00074277	RpL13A
E2QCG7	2.9874	0.0284768	eIF3-S9
L0MLQ9	2.98383	0.0143458	4E-T
Q9VG58	2.97153	0.000572303	Hsp70Bbb
A0A0B4LFB8	2.95771	0.0135203	Opa1
Q9W0P2	2.94014	0.0052607	Rev1
A0A0B4K6Y4	2.92994	0.001023	unk
Q7K4L8	2.92414	0.00287641	CG7878
Q8IPE8	2.91943	0.00105909	Mtpalpha
E1JHA4	2.91372	0.00035745	Hrb27C
N0D8I3	2.90512	0.00190018	Spt6-RA
O02195	2.90152	0.0131931	Trip1
D2NUK9	2.90114	0.00724268	hoip
Q8IRD2	2.8931	0.00146083	YT521-B
Q9VF10	2.88537	0.00724894	Fbxl7
Q9GYU8	2.87865	0.0050408	mbo
Q9W437	2.86995	0.00245882	raptor
Q9W1B9	2.85949	0.0124792	RpL12
A8JR84	2.85499	0.00245882	CG7029
A1ZAC4	2.83639	0.00992214	krimp
Q7KRW8-3	2.8342	0.00325416	CG1646
Q9W002	2.82334	0.000444136	msn
E1JH59	2.80132	0.00412596	mip120
Q9U1H9	2.79062	0.019457	sbr
Q9VRI0	2.77097	0.015144	Hlc
P23128	2.76565	0.00690534	me31B
Q9VJX3	2.72428	0.00245882	B4
Q59E49	2.72092	0.00145446	HDAC4
A1Z8U0	2.71184	0.00443614	Prp8
Q9VQ76	2.70623	0.00333544	tho2
Q9W4X7	2.69255	0.00231749	eIF3-S4-1
O18353	2.69078	0.0079009	Chi
Q9VX63	2.68329	0.00276344	CG8915-RA
A0A0B4KI59	2.66356	0.000733144	CG7903
M9PD65	2.65058	0.0356786	RanGAP
X2JL73	2.64708	0.00412596	rictor
Q9VX15	2.64547	0.00303342	CG8142
Q9I7F7	2.63744	0.00431087	PR2
Q9VWI2	2.63485	0.0042832	Nat1
P41375	2.62509	0.0079009	eIF-2beta
A1Z743	2.62374	0.00382749	CG30497
C7LA75	2.61798	0.000444136	Hsc70-4-RA
P13060	2.61586	0.0161076	EF2
A1Z6Q0	2.6014	0.00503023	koi
Q9VN55	2.58638	0.00381722	atms
M9PID3	2.57408	0.00252969	CG3680-RA
M9PEY6	2.57255	0.00245882	Rat1
A0A0B4LHC1	2.57206	0.0282644	RhoGAP92B-RA
A0A0B4LFJ8	2.57087	0.00189753	CG4853-RA
Q9VVI0	2.56837	0.00351119	U4-U6-60K
Q9VI72	2.56796	0.00243255	Sas-4
Q24368	2.56664	0.0113564	Iswi
Q5U156	2.55349	0.00257355	row
Q86CW5	2.55284	0.00669953	Hmr
Q9VTP4	2.55176	0.00109535	RpL10Ab
B7Z131	2.54083	0.00163057	C3G
Q9V6B9	2.54069	0.00247739	Nup54
M9PBM2	2.5378	0.0126837	enc
Q9VSW7	2.53253	0.0284128	CG4452
Q9W1X4	2.51238	0.013054	Nup214
A0A0B4LFQ2	2.48782	0.0140651	Incenp
Q7KJA9	2.48695	0.00362604	sxc
Q9VLR0	2.48672	0.00563439	CG8292-RA
Q9VU36	2.47584	0.016207	mRpL20
B7YZQ7	2.47046	0.00396773	Nurf-38
Q9VEN2	2.44553	0.00212629	cal1
Q9VK58	2.44097	0.0137013	Pih1D1
M9PHM6	2.43517	0.00714507	RpL18
Q9VKQ9	2.42274	0.00942684	Dpy-30L1
Q9NGC3-3	2.40466	0.0150708	CenG1A
Q8I937	2.39898	0.00302492	CG32409
Q9VN25-2	2.39314	0.00203477	eIF3-S10
B7YZQ1	2.39004	0.00732576	slik
Q9W0A8	2.37749	0.000975156	RpL23A
Q9V9R2	2.36662	0.0210017	Cul2
O46080	2.36615	0.0112259	CG3857
E2QC61	2.36294	0.00190225	bin3
A0A0B4KGP8	2.35925	0.00285559	eIF-2gamma
E1JGN7	2.33907	0.0146491	bl
Q8IMB8	2.31227	0.000721505	CG1674
Q9XYR0	2.29388	0.0114772	Traf4
Q9VAT2	2.28252	0.00950049	CG1523
O97102	2.27366	0.000733144	smt3
M9MSQ1	2.27068	0.00171866	CG5004-RA
O44437	2.26592	0.0210017	SmD3
Q9VGE2	2.25636	0.00791569	Spt3
E1JIM1	2.2515	0.00231749	nsl1
Q24276	2.24144	0.0135203	Cdc37
Q9VDI3	2.23219	0.00789554	ELC5
Q9VSE1	2.21953	0.00231749	CG7504
Q9VBZ5	2.21893	0.0103863	CG6422-RB
Q9VHC7	2.21828	0.0299858	rump
A0A0B4K7N2	2.21606	0.00218713	loco
A0A0B4JD95	2.20956	0.00186517	zip
Q9VQ58	2.1928	0.0179528	CG15356-RA
Q9W0M7	2.18226	0.0222752	CG13900-RA
O44434	2.16819	0.0275023	qkr58E-3
Q9VUM1	2.16517	0.00227896	Prp31
A1Z7Q8	2.16503	0.00780986	alc
Q86BS3	2.16376	0.00285517	Chro
Q9W1K4	2.16165	0.00780986	egl
Q0E924	2.16052	0.00404352	Phb2
Q9W1H5	2.15902	0.0193735	Dcp1
Q7K3M5	2.15791	0.0104105	Dhx15
Q9VSS2	2.15766	0.00238163	Srp68
A0A0B4KGU4	2.14812	0.00257886	bel
Q9VUH8	2.146	0.00683277	Tdrd3
M9NED4	2.13355	0.00340137	FBXL5
Q9VHE5	2.12555	0.0163632	RpL34b
Q8INQ9	2.09774	0.00171866	stck
Q9V719	2.09374	0.0134302	Sin1
Q9VSD6	2.09342	0.00253259	msk
M9NFP2	2.08116	0.0480828	Ect4
Q6NP69	2.07458	0.0367889	gfzf
Q8MSV2-7	2.06245	0.00101833	shep
Q9VKN7	2.06103	0.044497	ial
Q9VH84	2.04187	0.0017131	Pnn
